# Supplementary material for: The tomato RLK superfamily: phylogeny and functional predictions about the role of the LRRII-RLK subfamily in antiviral defense
Source: PubMed Central journal article supplement (PMC3552996; doi:10.1186/1471-2229-12-229), 2012-12-02
Supplement: 1471-2229-12-229-S3.pdf [file 1471-2229-12-229-S3.pdf]

| RLK subfamilies | RLKs in At | RLKs in Sl | RLKs in ancestral | dup. in At | dup. in Sl | del. in At | del. in Sl | t.r. in At | t.r. in Sl | def. genes in At | dev. genes in At |   |
|-----------------|------------|------------|-------------------|------------|------------|------------|------------|------------|------------|------------------|------------------|---|
| C-LEC           | 1          | 1          | 1                 | 0          | 0          | 0          | 0          | 0          | 1          | 1                |                  |   |
| CR4L            | 8          | 7          | 8                 | 1          | 1          | 1          | 2          | 0          | 2          | 1                |                  |   |
| CrRLK1L-1       | 15         | 23         | 16                | 4          | 8          | 5          | 1          | 2          | 6          | 1                | 10*              | ← |
| DUF26           | 45         | 19         | 11                | 35*        | 10         | 1          | 2          | 38*        | 13*        | 20*              | 1                | ← |
| Extensin        | 5          | 6          | 6                 | 0          | 0          | 1          | 0          | 0          | 0          | 0                | 1                |   |
| L-LEC           | 45         | 23         | 19                | 30*        | 8          | 4          | 4          | 28*        | 4          | 8                | 4                | ← |
| LRK10L-2        | 13         | 14         | 4                 | 12*        | 10*        | 3          | 0          | 11*        | 9          | 2                | 0                | ← |
| LysMI           | 2          | 6          | 4                 | 0          | 2          | 2          | 0          | 0          | 2          | 1                | 0                |   |
| LysMII          | 2          | 7          | 6                 | 0          | 2          | 4*         | 1          | 0          | 2          | 1                | 0                |   |
| PERK            | 19         | 19         | 14                | 9          | 7          | 4          | 2          | 5          | 0          | 1                | 11*              | ← |
| RKF3            | 2          | 2          | 2                 | 0          | 0          | 0          | 0          | 0          | 0          | 0                | 0                |   |
| SD-1            | 31         | 61         | 17                | 23*        | 44*        | 9          | 0          | 25*        | 45*        | 2                | 0                | ← |
| SD-2b           | 7          | 27         | 11                | 0          | 16*        | 4          | 0          | 0          | 12         | 1                | 0                |   |
| SD-3            | 1          | 1          | 1                 | 0          | 0          | 0          | 0          | 0          | 0          | 0                | 1                |   |
| URK-I           | 2          | 2          | 2                 | 1          | 0          | 1          | 0          | 0          | 0          | 0                | 0                |   |
| WAK             | 22         | 15         | 9                 | 18*        | 8          | 5          | 2          | 16*        | 9*         | 3                | 2                | ← |
| WAK/LRK10L-1    | 7          | 15         | 8                 | 2          | 10         | 3          | 3          | 0          | 8*         | 4*               | 0                | ← |
| LRR-Ia          | 43         | 2          | 4                 | 40*        | 0          | 1          | 2*         | 36*        | 0          | 8                | 1                | ← |
| LRR-Ib          | 2          | 2          | 2                 | 0          | 0          | 0          | 0          | 0          | 0          | 2*               | 0                | ← |
| LRR-Ic          | 3          | 4          | 4                 | 0          | 0          | 1          | 0          | 0          | 0          | 1                | 0                |   |
| LRR-II          | 14         | 13         | 12                | 4          | 4          | 2          | 3          | 2          | 0          | 6*               | 8*               | ← |
| LRR-III         | 47         | 44         | 43                | 15         | 8          | 11         | 7          | 2          | 0          | 1                | 13               |   |
| LRR-IV          | 3          | 2          | 3                 | 1          | 0          | 1          | 1          | 0          | 0          | 0                | 2                |   |
| LRR-IV-sis      | 1          | 1          | 1                 | 0          | 0          | 0          | 0          | 0          | 0          | 0                | 0                |   |
| LRR-V           | 8          | 9          | 7                 | 2          | 3          | 1          | 1          | 0          | 0          | 0                | 1                |   |
| LRR-VI          | 14         | 12         | 9                 | 5          | 6          | 0          | 3          | 0          | 0          | 2                | 1                |   |
| LRR-VIIa        | 7          | 8          | 8                 | 1          | 1          | 2          | 1          | 0          | 0          | 0                | 6*               | ← |
| LRR-VIIb        | 3          | 2          | 3                 | 0          | 0          | 0          | 1          | 0          | 0          | 1                | 1                |   |
| LRR-VIII-1      | 8          | 8          | 6                 | 3          | 2          | 1          | 0          | 3          | 5          | 0                | 0                |   |
| LRR-VIII-2      | 14         | 19         | 14                | 6          | 7          | 6          | 2          | 10*        | 8          | 1                | 0                |   |
| LRR-IX          | 4          | 8          | 7                 | 0          | 3          | 3          | 2          | 0          | 0          | 1                | 1                |   |
| LRR-Xa          | 4          | 6          | 4                 | 1          | 2          | 1          | 0          | 0          | 0          | 2                | 0                |   |
| LRR-Xb          | 10         | 11         | 12                | 0          | 0          | 2          | 1          | 0          | 0          | 5*               | 4                | ← |
| LRR-Xc          | 2          | 4          | 2                 | 0          | 2          | 0          | 0          | 0          | 2          | 1                | 0                |   |
| LRR-XI          | 26         | 31         | 29                | 4          | 7          | 7          | 5          | 6          | 6          | 5                | 21*              | ← |
| LRR-XII         | 8          | 48         | 5                 | 5          | 43*        | 2          | 0          | 4          | 31*        | 2                | 0                | ← |
| LRR-XIIb        | 2          | 6          | 2                 | 1          | 4          | 1          | 0          | 0          | 4          | 2*               | 0                |   |
| LRR-XIIIa       | 4          | 3          | 3                 | 1          | 0          | 0          | 0          | 0          | 0          | 0                | 3*               | ← |
| LRR-XIIIb       | 3          | 2          | 2                 | 1          | 0          | 0          | 0          | 0          | 0          | 1                | 3*               | ← |
| LRR-XIV         | 3          | 3          | 3                 | 1          | 0          | 1          | 0          | 0          | 0          | 0                | 2                |   |
| LRR-XV          | 3          | 8          | 5                 | 0          | 4          | 2          | 1          | 0          | 4          | 3*               | 2                | ← |
| RLCK-II         | 4          | 2          | 2                 | 2          | 1          | 0          | 1          | 2          | 0          | 1                | 0                |   |
| RLCK-IV         | 3          | 2          | 3                 | 0          | 0          | 0          | 1          | 0          | 0          | 2                | 1                |   |
| RLCK-V          | 11         | 8          | 9                 | 4          | 0          | 2          | 1          | 0          | 0          | 1                | 1                |   |
| RLCK-VI         | 14         | 14         | 12                | 4          | 3          | 2          | 1          | 0          | 0          | 4                | 0                |   |
| RLCK-VIIa       | 45         | 55         | 40                | 14         | 20         | 9          | 5          | 6          | 12         | 10               | 4                |   |
| RLCK-VIIb       | 1          | 0          | 1                 | 0          | 0          | 0          | 1          | 0          | 0          | 0                | 1                |   |
| RLCK-VIII       | 11         | 7          | 4                 | 7          | 4          | 0          | 1          | 4          | 0          | 2                | 1                |   |
| RLCK-VIII-sis   | 1          | 1          | 1                 | 0          | 0          | 0          | 0          | 0          | 0          | 0                | 1                |   |
| RLCK-IXa        | 2          | 2          | 3                 | 0          | 0          | 1          | 1          | 0          | 0          | 0                | 0                |   |
| RLCK-IXb        | 19         | 15         | 15                | 8          | 3          | 4          | 3          | 2          | 0          | 13*              | 2                | ← |
| RLCK-X          | 4          | 2          | 2                 | 3          | 0          | 1          | 0          | 0          | 0          | 0                | 0                |   |
| RLCK-XI         | 4          | 3          | 4                 | 1          | 0          | 1          | 1          | 0          | 0          | 2                | 0                |   |
| RLCK-XII        | 13         | 7          | 9                 | 4          | 2          | 0          | 4*         | 2          | 2          | 1                | 1                |   |
| RLCK-XII/XIII   | 12         | 2          | 1                 | 11*        | 1          | 0          | 0          | 10*        | 0          | 1                | 0                | ← |
| RLCK-XIII       | 2          | 2          | 1                 | 1          | 1          | 0          | 0          | 0          | 0          | 1                | 0                |   |
| RLCK-XIV        | 1          | 1          | 1                 | 0          | 0          | 0          | 0          | 0          | 0          | 0                | 0                |   |
| RLCK-XV         | 2          | 3          | 2                 | 1          | 1          | 1          | 0          | 0          | 0          | 0                | 0                |   |
| RLCK-XVI        | 1          | 1          | 1                 | 1          | 1          | 1          | 1          | 0          | 0          | 0                | 0                |   |
| Total           | 613        | 631        | 440               | 287        | 259        | 114        | 68         | 129        | 113        | 214              | 184              |   |
